# Supplementary material for: The Malaria Parasite's Lactate Transporter PfFNT Is the Target of Antiplasmodial Compounds Identified in Whole Cell Phenotypic Screens
Source: PubMed Central journal article supplement (PMC5298231; doi:10.1371/journal.ppat.1006180), 2017-02-08
Supplement: ppat.1006180.s002.pdf [file ppat.1006180.s002.pdf]

**Supplementary Table 2. Primers used in this study.**

| <b>Primer</b> | <b>Direction</b> | <b>Sequence (5' – 3')</b>                 |
|---------------|------------------|-------------------------------------------|
| 1             | Forward          | ATGCCACCAAATAATTCCAAATATG                 |
| 2             | Reverse          | TCAATTTTCGTAATTCTATAGATAAAC               |
| 3             | Forward          | GGTGCTGTATCTTTTGCATTTTTTG                 |
| 4             | Reverse          | GCCCACAGCTAATGACACACATTC                  |
| 5             | Forward          | GTAGGAGCATCGATGAGTGTG                     |
| 6             | Reverse          | CTGCTATTCCGGAAGCGTGTG                     |
| 7             | Forward          | GATTGCTGGTGCAATTGTTTTGG                   |
| 8             | Reverse          | CACCTGGGATAATTAATAATC                     |
| 9             | Forward          | CAGGTTCTGATTTGTTTACGAGTAATACTTTAGCAGTAACC |
| 10            | Reverse          | GGTACTGCTAAAGTATTACTCGTAAACAAATCAGAACCTG  |
